# Supplementary material for: Raman spectroscopy of bottom-up synthesized graphene quantum dots: size and structure dependence
Source: Royal Society of Chemistry journal article supplement (doi:10.1039/c9nr05345j), 2019-01-01
Supplement: c9nr05345j1.pdf [file c9nr05345j1.pdf]

## Supplementary Information

### Raman spectroscopy of bottom-up synthesized graphene quantum dots: size and structure dependence

Enkeleda Dervishi,<sup>†</sup> Zhiqiang Ji,<sup>‡</sup> Han Htoon,<sup>†</sup> Milan Sykora,<sup>‡,§</sup> and Stephen K.  
Doorn<sup>†\*</sup>

<sup>†</sup>Materials Physics and Applications Division, Center for Integrated Nanotechnologies,

<sup>‡</sup>Chemistry Division, Los Alamos National Laboratory, Los Alamos, New Mexico 87545, United  
States

<sup>§</sup>Present address: Laboratory for Advanced Materials, Faculty of Natural Sciences, Comenius  
University, 84215 Bratislava, Slovakia

**Table S1:** Graphene quantum dots (GQDs) with 19, 48 and 79 ordered carbon rings and their corresponding dimensions.

| Sample Name | Number of<br>sp <sup>2</sup> Carbons<br>(n) | Number of<br>Conjugated<br>Rings (N <sub>CR</sub> ) | Size (L in nm) |
|-------------|---------------------------------------------|-----------------------------------------------------|----------------|
| GQD(1)      | 60                                          | 19                                                  | 0.97           |
| GQD(2)      | 132                                         | 48                                                  | 1.51           |
| GQD(3)      | 204                                         | 79                                                  | 1.62           |

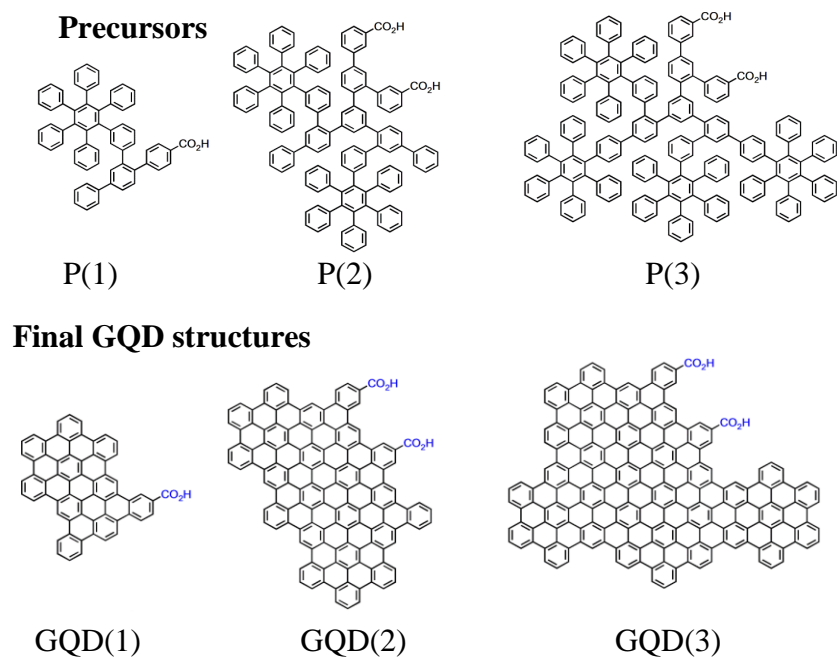

**Fig. S1:** Chemical structures of the precursors (P(i)) and the corresponding graphene quantum dots (GQD(i)).

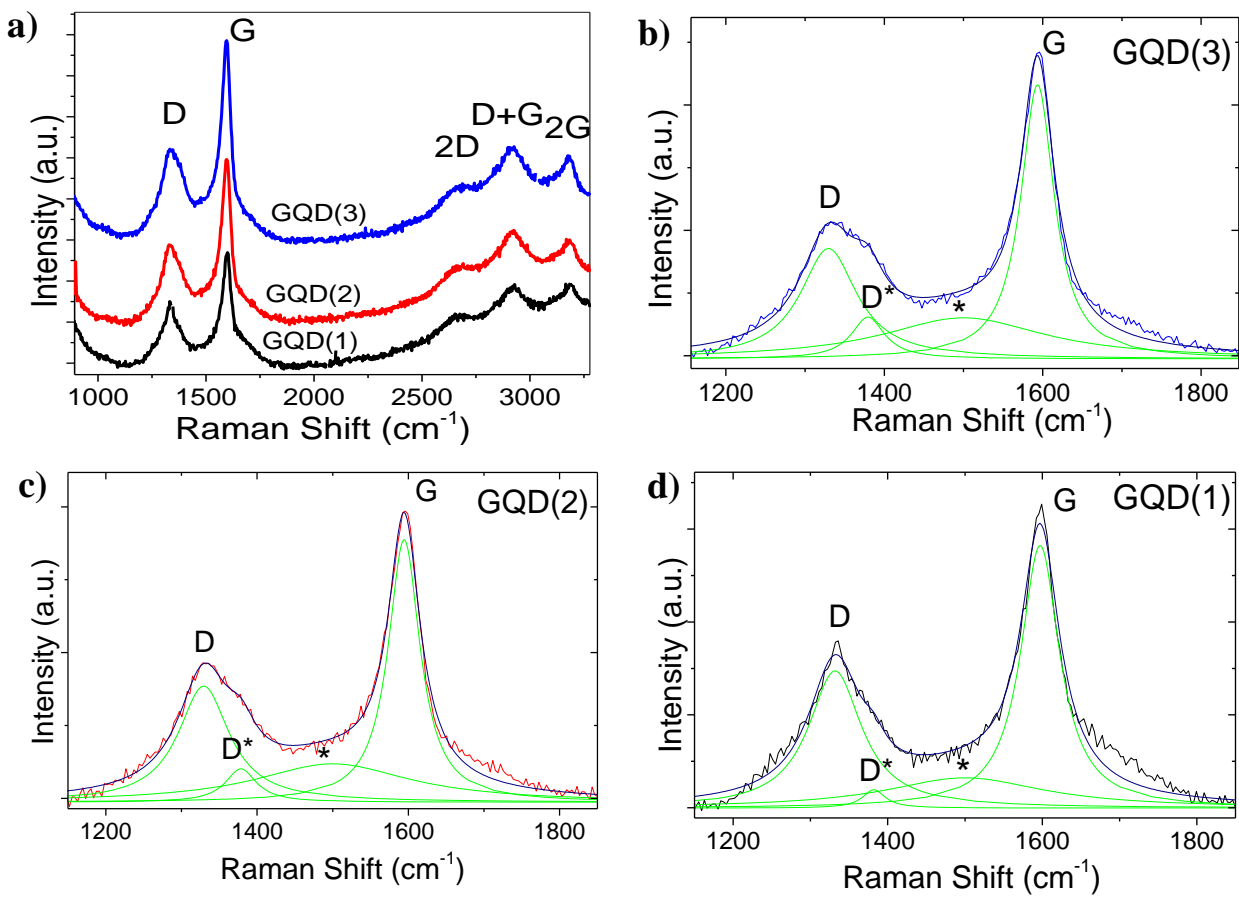

**Fig. S2.** (a) Raman spectra of graphene quantum dots with various sizes recorded with 405 nm excitation wavelength. (Spectra are vertically offset for clarity). (b-d) Zoom of D and G band spectral region and deconvolution of D and G bands using Lorentzian fits.

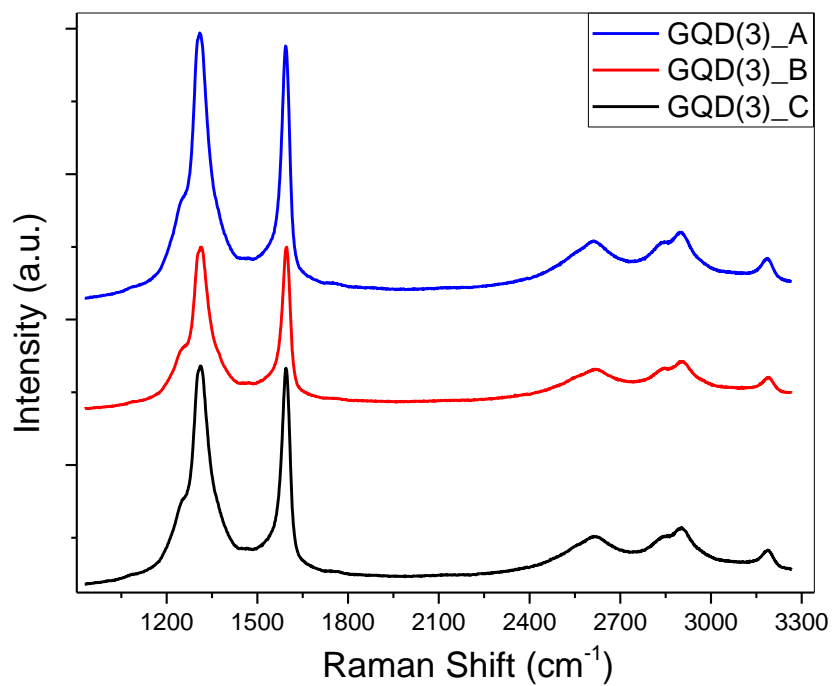

**Fig. S3:** Raman spectra (532 nm exc.) of GQD(3) taken at 3 separate locations on the same film. Similarity in appearance indicates a high degree of homogeneity in the GQD synthesis.

## Model Relating $I_D/I_G$ to $L_D$ for Disordered Large-Area Graphene and Relation to Data for GQDs:

As noted in the main text, the D-to-G-band intensity ratio in intentionally disordered large-area graphene has been described by Jorio et al.<sup>1,2</sup> as the sum of contributions from the activated area in the region within the Raman coherence length of the defects and from the disordered region itself:

$$\frac{I_D}{I_G} = C_A f_A + C_S f_S \quad (\text{S1})$$

In eq. 1,  $f_A$  is the fractional activated area, while  $f_S$  is the fractional disordered area of the defects themselves, with  $C_A$  and  $C_S$  being the respective scaling coefficients. The expression may be expanded in terms of the radius of the activated and disordered regions ( $r_A$  and  $r_S$ , respectively) and the inter-defect distance  $L_D$ :<sup>1</sup>

$$\frac{I_D}{I_G} = C_A \frac{(r_A^2 - r_S^2)}{(r_A^2 - 2r_S^2)} \left[ e^{-\frac{\pi r_S^2}{L_D}} - e^{-\pi(r_A^2 - r_S^2)/L_D} \right] + C_S \left[ 1 - e^{-\frac{\pi r_S^2}{L_D}} \right] \quad (\text{S2})$$

In the case for which both the activated and disorder terms are included in the determination,  $C_A$  is taken as 4.2, and  $C_S$  is taken as 0.87.<sup>1</sup> In the absence of the disorder term (*i.e.*  $C_S = 0$ ),  $C_A$  is taken as 4.72.<sup>2</sup>  $r_A$  in both cases is taken as 3 nm and  $r_S$  as 1 nm. These values were obtained for laser excitation at 514 nm, while our data was obtained with excitation at 532 nm. It has been shown that the  $I_D/I_G$  ratio is proportional to the inverse fourth power of the excitation energy ( $E$ ).<sup>2</sup> To correct for the different excitation energy, the model results calculated from eq. S2 (shown in Fig. 4b of the main text) were multiplied by  $(532/514)^4$ .

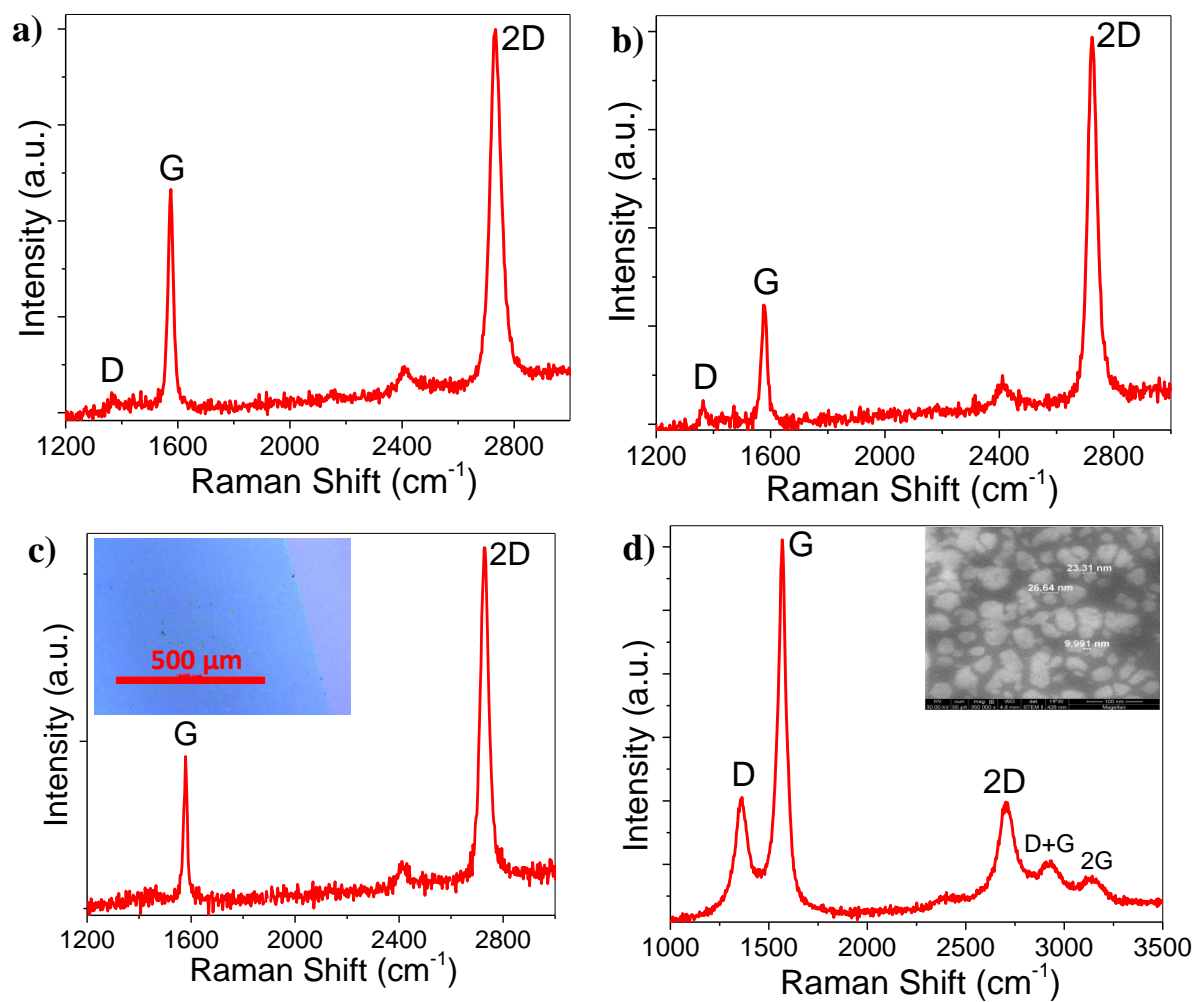

**Fig. S4:** (a-c) Raman spectra of large area graphene recorded with 405 nm excitation at three different positions. The inset shows an optical microscopy image of large-area graphene transferred over Si/SiO<sub>2</sub> wafer (scale bar: 500  $\mu\text{m}$ ). (d) Raman spectrum of nano-graphene platelet structures recorded with 405 nm excitation. The inset shows an SEM image of typical platelet structures and their size distribution.

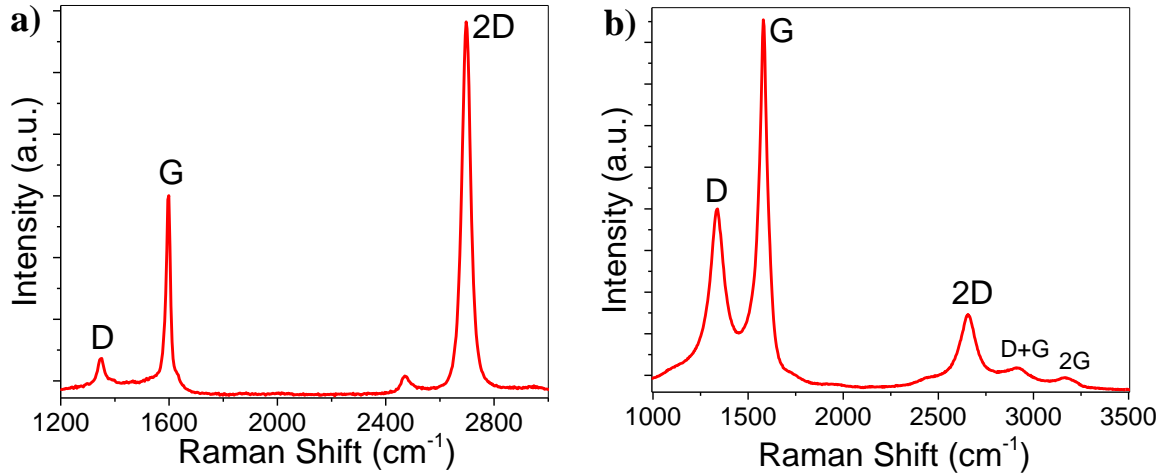

**Fig. S5:** Raman recorded with 532 nm excitation for (a) large area graphene and (b) nano-graphene platelets.

The intensity of the 2D band in the Raman spectrum of a single-layer large-area graphene with very few defects becomes larger than that of the G band, while the rest of the second order bands disappear.<sup>3</sup> The average D and G frequencies for nano-graphene platelets recorded with 405 nm excitation were found to be  $1360\text{ cm}^{-1}$  and  $1567\text{ cm}^{-1}$ , respectively. The average D and G frequencies for large-area graphene recorded with 405 nm excitation were found to be  $1367\text{ cm}^{-1}$  and  $1576\text{ cm}^{-1}$ , respectively. The average D and G frequencies for nano-graphene platelets recorded with 532 nm excitation were found to be  $1337\text{ cm}^{-1}$  and  $1587\text{ cm}^{-1}$ , respectively. The average D and G frequencies for large-area graphene recorded with 532 nm excitation were found to be  $1351\text{ cm}^{-1}$  and  $1594\text{ cm}^{-1}$ , respectively.

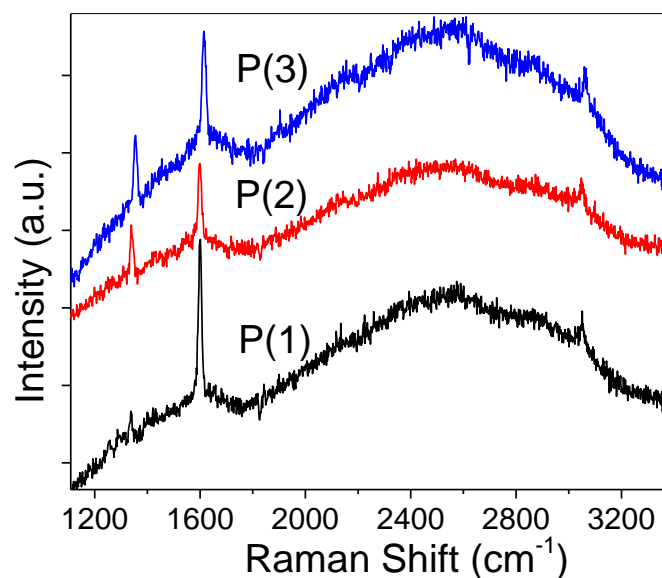

**Figure S6:** Raman spectra of the precursors used to synthesize the graphene quantum dots, recorded with 532 nm excitation. (Spectra are vertically offset for clarity).

## References

1. M. M. Lucchese, F. Stavale, E. H. Martins Ferreira, C. Vilani, M. V. O. Moutinho, R. B. Capaz, C. A. Achete and A. Jorio, *Carbon*, 2010, 48, 1592-1597.
2. L. G. Cancado, A. Jorio, E. H. Martins Ferreira, F. Stavale, C. A. Achete, R. B. Capaz, M. V. O. Moutinho, A. Lombardo, T. S. Kulmala and A. C. Ferrari, *Nano Lett.*, 2011, 11, 3190-3196.
3. E. H. M. Ferreira, M. V. O. Moutinho, F. Stavale, M. M. Lucchese, R. B. Capaz, C. A. Achete and A. Jorio, *Phys. Rev. B*, 2010, 82, 125429.
